# Supplementary material for: Effect of a Multifaceted Intervention on the Incidence of Hemodialysis Catheter Dysfunction in a National Stepped-Wedge Cluster Randomized Trial
Source: PubMed Central journal article supplement — Kidney Int Rep. 2023 Jul 27;8(10):1941–50. doi: 10.1016/j.ekir.2023.07.013 (PMC10577327; doi:10.1016/j.ekir.2023.07.013), 2023-07-27
Supplement: mmc1.pdf [file mmc1.pdf]

## Supplementary Material

Lazarus B, Kotwal S, Gallagher M, Gray N, Coggan S, Rogers K, Talaulikar G, Polkinghorne K. **Effect of a multifaceted intervention on the incidence of haemodialysis catheter dysfunction in a national stepped-wedge cluster randomized trial.** *Kidney International Reports*, 2023

|                                                                                                                                                                                                                  |    |
|------------------------------------------------------------------------------------------------------------------------------------------------------------------------------------------------------------------|----|
| <b>Supplementary Appendix.</b> List of trial investigators.                                                                                                                                                      | 2  |
| <b>Supplementary Methods.</b> Details of trial methods.                                                                                                                                                          | 6  |
| <b>Supplementary Table S1.</b> Baseline characteristics of tunnelled catheters during baseline, intervention or both phases.                                                                                     | 7  |
| <b>Supplementary Table S2.</b> Relationship between patient-level and catheter-level covariates and the incidence of catheter dysfunction among tunnelled catheters from three-level Poisson regression models.  | 8  |
| <b>Supplementary Figure S1.</b> Illustration of multiple levels of clustering when catheter-level characteristics are included in assessing the intervention effect in a stepped-wedge cluster randomized trial. | 9  |
| <b>Supplementary Figure S2.</b> Participant flow diagram for the post-hoc analysis of the REDUCTION national stepped-wedge cluster randomized trial.                                                             | 10 |

**Supplementary Appendix.** List of trial investigators.

| <b>Service</b>                         | <b>First name</b> | <b>Last name</b> |
|----------------------------------------|-------------------|------------------|
| Alice Springs Hospital                 | Senthil Kumar     | Balakrishnan     |
| Alice Springs Hospital                 | David             | Fernandes        |
| Armadale Hospital                      | Hemant            | Kulkarni         |
| Armadale Hospital                      | Casey             | Light            |
| Armadale Hospital                      | Jo                | Ryan             |
| Auckland Hospital                      | Emma              | Marsh            |
| Auckland Hospital                      | David             | Semple           |
| Auckland Hospital                      | Jason             | Wei              |
| Alfred Health                          | Omar              | Tombocon         |
| Alfred Health                          | Rowan             | Walker           |
| Alfred Health                          | Scott             | Wilson           |
| Austin Health                          | Vilma             | Lleva            |
| Austin Health                          | Lucy              | Mwangi           |
| Austin Health                          | Peter             | Mount            |
| Austin Health                          | Maree             | Ross-Smith       |
| Austin Health                          | Marieke           | Veenendaal       |
| Barwon Health                          | Vicki             | Smith            |
| Barwon Health                          | Christine         | Somerville       |
| Cairns Hospital                        | Shaun             | Davidson-West    |
| Cairns Hospital                        | Natalie           | Grainer          |
| Cairns Hospital                        | Stella            | Green            |
| Cairns Hospital                        | Murty             | Mantha           |
| Cairns Hospital                        | Kati              | Thiessen         |
| Canberra Hospital                      | Girish            | Talaulikar       |
| Canberra Hospital                      | Alison            | Winsbury         |
| Canberra Hospital                      | Irene             | Yao              |
| Canberra Hospital                      | Emily             | Neville          |
| Concord Hospital                       | Khalilah          | Marquez          |
| Concord Hospital                       | Mona              | Razavian         |
| Concord Hospital                       | Lisa              | Tienstra         |
| Concord Hospital                       | Glenn             | Stewart          |
| Eastern Health                         | Cathy             | Chan             |
| Eastern Health                         | Peta              | McLean           |
| Eastern Health                         | Lawrence          | McMahon          |
| Eastern Health                         | Matthew           | Roberts          |
| Eastern Health                         | Dong              | Wang             |
| Fiona Stanley Hospital                 | Monika            | Chang            |
| Fiona Stanley Hospital                 | Anna              | Chiam            |
| Fiona Stanley Hospital                 | Duncan            | Wright           |
| Fiona Stanley Hospital                 | Orla              | O'Brien          |
| Fiona Stanley Hospital                 | Ramyasuda         | Swaminathan      |
| Fiona Stanley Hospital                 | Samadhi           | Wimalasena       |
| Fiona Stanley Hospital                 | Harish            | Puttagunta       |
| Flinders Medical Centre                | Jeffrey           | Barbara          |
| Flinders Medical Centre                | Amanda            | Luke             |
| Flinders Medical Centre                | Margaret          | Pummeroy         |
| Flinders Medical Centre                | Kim               | Torpey           |
| Gold Coast Hospital and Health Service | Gemma             | Nicholls         |
| Gold Coast Hospital and Health Service | Amy               | Swinbank         |
| Gold Coast Hospital and Health Service | Thomas            | Titus            |
| John Hunter Hospital                   | Peter             | Choi             |
| John Hunter Hospital                   | Ginger            | Chu              |
| John Hunter Hospital                   | Leanne            | Garvey           |
| John Hunter Hospital                   | Alastair          | Gillies          |
| Liverpool Hospital                     | Josephine         | Chow             |

|                                         |               |              |
|-----------------------------------------|---------------|--------------|
| Liverpool Hospital                      | Imelda        | De Guzman    |
| Liverpool Hospital                      | Jeanny        | Gando        |
| Liverpool Hospital                      | Jeffrey       | Wong         |
| Liverpool Hospital                      | Richard       | Nguyen       |
| Mackay Hospital                         | Roy           | Cherian      |
| Mackay Hospital                         | Raye          | Gillard      |
| Mackay Hospital                         | Rachel        | James        |
| Mater Hospital                          | Michael       | Burke        |
| Mater Hospital                          | Leanne        | Glancy       |
| Mater Hospital                          | Shimbie       | Lewis        |
| Mater Hospital                          | Richard       | Baer         |
| Mater Hospital                          | Sophie        | Wade         |
| Monash Health                           | Kate          | Fitt         |
| Monash Health                           | Peter         | Kerr         |
| Monash Health                           | Kevan         | Polkinghorne |
| Monash Health                           | Mechelle      | Seneviratne  |
| Nepean Hospital                         | Muralikrishna | Komala       |
| Nepean Hospital                         | Junie         | McCourt      |
| Nepean Hospital                         | Craig         | Lawlor       |
| Ipswich Hospital                        | Julia         | Bell         |
| Ipswich Hospital                        | David W       | Johnson      |
| Prince of Wales Hospital                | Michaela      | Kelleher     |
| Prince of Wales Hospital                | Sradha        | Kotwal       |
| Metro South Hospital and Health Service | Amanda        | Coburn       |
| Metro South Hospital and Health Service | Sarah         | Guo          |
| Metro South Hospital and Health Service | David W       | Johnson      |
| Metro South Hospital and Health Service | Joanna        | Sudak        |
| Metro South Hospital and Health Service | Diana         | Leary        |
| Rockhampton Hospital                    | Jenny         | Anderson     |
| Rockhampton Hospital                    | Thin          | Han          |
| Rockhampton Hospital                    | Tresna        | Titmarsh     |
| Royal Adelaide Hospital                 | Emily         | Adam         |
| Royal Adelaide Hospital                 | Bronwyn       | Hockley      |
| Royal Adelaide Hospital                 | Jenny         | Latte        |
| Royal Adelaide Hospital                 | Yvonne        | Matthew      |
| Royal Adelaide Hospital                 | Stephen       | McDonald     |
| Royal Adelaide Hospital                 | Chen Au       | Peh          |
| Royal Adelaide Hospital                 | Rebecca       | Taylor       |
| Royal Brisbane Hospital                 | David         | McIntyre     |
| Royal Brisbane Hospital                 | Sharadchandra | Ratanjee     |
| Royal Darwin Hospital                   | Karolynn      | Maurice      |
| Royal Darwin Hospital                   | Fiona         | Rettie       |
| Royal Darwin Hospital                   | Madhivanan    | Sundaram     |
| Royal Darwin Hospital                   | Naomi         | Grimshaw     |
| Royal Hobart Hospital                   | Matthew       | Jose         |
| Royal Hobart Hospital                   | Gail          | Read         |
| Royal Melbourne Hospital                | Jayne         | Amy          |
| Royal Melbourne Hospital                | Patricia      | Coutts       |
| Royal Melbourne Hospital                | Maria         | Presno       |
| Royal Melbourne Hospital                | Nigel         | Toussaint    |
| Royal North Shore Hospital              | Debbie        | Knagge       |
| Royal North Shore Hospital              | Colleen       | Van Senden   |
| Royal North Shore Hospital              | Linh          | Pham         |
| Royal North Shore Hospital              | Muh Geot      | Wong         |
| Royal Prince Alfred Hospital            | Jane          | Nicholson    |
| Royal Prince Alfred Hospital            | Paul          | Snelling     |
| Sir Charles Gairdner Hospital           | Neil          | Boudville    |
| Sir Charles Gairdner Hospital           | Alison        | Farmer       |

|                                            |            |                |
|--------------------------------------------|------------|----------------|
| Sir Charles Gairdner Hospital              | Ingrid     | Holmes         |
| Sir Charles Gairdner Hospital              | Victoria   | Link           |
| Sir Charles Gairdner Hospital              | Vivien     | Perreau        |
| Sir Charles Gairdner Hospital              | Nicole     | Warnecke       |
| St George Hospital                         | Sunil      | Badve          |
| St George Hospital                         | Yanella    | Martinez-Smith |
| St George Hospital                         | Jayson     | Catiwa         |
| St Vincent's Hospital                      | Frank      | Ierino         |
| St Vincent's Hospital                      | Emmet      | O'flaherty     |
| Sunshine Coast Hospital and Health Service | Nicholas   | Gray           |
| Sunshine Coast Hospital and Health Service | Gerald     | Hilder         |
| Sunshine Coast Hospital and Health Service | Kaylene    | Wadd           |
| Sunshine Coast Hospital and Health Service | Andrea     | Pollock        |
| Sunshine Coast Hospital and Health Service | Stanley    | Searle         |
| Tamworth Hospital                          | Cheryl     | Wertheim       |
| Tamworth Hospital                          | Stephen    | May            |
| Tamworth Hospital                          | Jill       | Telfer         |
| The George Institute for Global Health     | Martin     | Gallagher      |
| The George Institute for Global Health     | Sradha     | Kotwal         |
| The George Institute for Global Health     | Sarah      | Coggan         |
| The George Institute for Global Health     | Casey      | Yates          |
| The George Institute for Global Health     | Kathryn    | Higgins        |
| The George Institute for Global Health     | Earl       | James          |
| The George Institute for Global Health     | Alison     | Coenen         |
| The George Institute for Global Health     | Kris       | Rogers         |
| The George Institute for Global Health     | Gian Luca  | Di Tanna       |
| The George Institute for Global Health     | Jayanthi   | Mysore         |
| The George Institute for Global Health     | Joseph     | Alvin Santos   |
| The George Institute for Global Health     | Benjamin   | Talbot         |
| The George Institute for Global Health     | Katrina    | Thistlethwaite |
| Toowoomba Hospital                         | Elizabeth  | Coroneos       |
| Toowoomba Hospital                         | Shannon    | Nugent         |
| Toowoomba Hospital                         | Ian        | Fox            |
| Toowoomba Hospital                         | Sree       | Venuthurupalli |
| Western Health                             | Jennifer   | Connor         |
| Western Health                             | Ruth       | Thachaw        |
| Western Health                             | Sandra     | Crikis         |
| Wollongong Hospital                        | Pauline    | Byrne          |
| Wollongong Hospital                        | Karumathil | Murali         |
| Wollongong Hospital                        | Hicham     | Cheikh Hassan  |
| Western Sydney Local Health District       | Lin        | Huang          |
| Western Sydney Local Health District       | Romiereeza | Dizon          |
| Western Sydney Local Health District       | Deepika    | Joshi          |
| Western Sydney Local Health District       | Jon        | Mendoza        |
| Western Sydney Local Health District       | Bishi      | Augustine      |
| Western Sydney Local Health District       | Disha      | Balraj         |
| Western Sydney Local Health District       | Vincent    | Lee            |
| Western Sydney Local Health District       | David      | O'Donnell      |

## Supplementary Methods. Details of trial methods.

### Details of the covariate-constrained randomization method.

In this trial 37 nephrology services were randomized, and each service varied in size. Some services had fewer haemodialysis patients, others had more, and the number of catheters used in each service therefore also varied. If randomization of services was performed without considering these differences in catheter use, it is possible that substantial imbalance in the average number of catheters in each of the three tranches could occur by chance, which would reduce the power of the study. To mitigate this possibility, baseline data on the number of catheters used at each service (from Dec 2016 – Jan 2018) was incorporated into the randomization process. Specifically, 100,000 random allocation sequences were generated and those sequences in which the average number of catheters per service in each tranche were balanced (within 10% of the overall trial average) were retained. Of the original sequences generated, 6865 met the balance criteria, and the final randomization allocation was randomly chosen from this subset.

### Details of the trial intervention.

The catheter management interventions were developed by a trial Sub-committee following an independent evidence-based review and were finalized in January 2018. Haemodialysis catheter-related bloodstream infections were the primary consideration in designing the interventions, however non-infectious catheter complications were also considered as secondary outcomes of interest. Two local champions, consisting of one physician and one nurse, were identified at each nephrology service, and were tasked with implementing the intervention at their service.

1. At the time of catheter insertion
  - 1.1. Surgical aseptic technique (hand hygiene, sterile gloves, surgical mask, eye protection and gown), and a sterile environment (sterile surgical field on the patient) and/or a sterile room as per unit availability **MUST** be applied.
  - 1.2. An antiseptic solution using a minimum of 2% chlorhexidine with 70% alcohol **MUST** be used
    - 1.2.1. For those who cannot tolerate chlorhexidine, povidone–iodine or 70% alcohol may be used
  - 1.3. Site of insertion
    - 1.3.1. The right internal jugular vein is the best site for catheter insertion
    - 1.3.2. Catheters in the subclavian vein should be avoided due to incidence of central vein stenosis.
    - 1.3.3. Avoid femoral catheters where possible
  - 1.4. We do not recommend any specific catheter type
  - 1.5. Ultrasound guided catheter placement is recommended if the resources are available
  - 1.6. Semi permeable transparent dressing **MUST** be applied to the line. If a patient is allergic to these dressings, then an alternative appropriate dressing may be used.
  - 1.7. All patients **MUST** receive education on the following topics
    - 1.7.1. Vascular access care
    - 1.7.2. Hand hygiene
    - 1.7.3. Risks related to catheter use
    - 1.7.4. Recognizing signs of infection
    - 1.7.5. Instructions for access management when away from the dialysis unit
    - 1.7.6. To ensure that their catheter and exit site are kept dry.
    - 1.7.7. To seek assistance from dialysis should a dressing become wet, soiled or leak, or if the catheter itself begins to slip out
    - 1.7.8. To **NOT** shower in the first 72 hours after catheter insertion. After 72 hours, in order to have a shower, the catheter site must be covered with waterproof material.
  - 1.8. All patients **SHOULD** receive a copy of the REDUCTION catheter care sheet

## 2. Catheter maintenance

- 2.1. Hand hygiene, sterile gloves, a plastic apron, and aseptic technique (hand hygiene, gloves) **MUST** be applied at all occasions of catheter access
  - 2.1.1. An antiseptic solution using a minimum of 2% chlorhexidine with 70% alcohol must be used
  - 2.1.2. For those unable to tolerate chlorhexidine, povidone–iodine or 70% alcohol may be used
- 2.2. Dressing must be changed at least every 7 days and each time the dressing appears visibly soiled or loose
  
- 2.3. We do **NOT** recommend the routine use of mupirocin ointment or medicated honey at the catheter exit site.
- 2.4. All units **MUST** use **at least one** of the following specific interventions aimed at prophylaxis against catheter related bacteraemia\*
  - 2.4.1. Impregnated dressings (such as chlorhexidine impregnated patch or sponge) at the catheter exit site and/or
  - 2.4.2. Anti-microbial (e.g. citrate or taurolidine based) or anti-bacterial (e.g. gentamicin) catheter locking solutions #
- 2.5. All patients must be advised to ensure that their catheter and exit site are kept dry. Patients must be advised to seek assistance from dialysis should a dressing become wet, soiled or leak, or if the catheter itself begins to slip out.
- 2.6. All patients should receive a copy of the REDUCTION catheter care sheet as above
- 2.7. All patients must receive education on the following topics
  - 2.7.1. Vascular access care
  - 2.7.2. Hand hygiene
  - 2.7.3. Risks related to catheter use
  - 2.7.4. Recognizing signs of infection
  - 2.7.5. Instructions for access management when away from the dialysis unit
- 2.8. All patients must be advised **NOT** to shower in the first 72 hours after catheter insertion. After 72 hours, in order to have a shower, the catheter site must be covered with waterproof material.

\*check manufacturer’s instructions when choosing the intervention to ensure compatibility with catheters

#with the use of gentamicin locks, monitoring of antibiotic resistance should be considered as per hospital policy

## 3. Catheter removal

- 3.1. Catheters **MUST** be removed as soon as it is clinically identified that they are no longer needed and within a maximum of 2 weeks of their last use.
- 3.2. Non-Tunnelled catheters should be changed to tunnelled catheters as soon as possible. Non-tunnelled femoral catheters should not be in place for more than 5 days, and non-tunnelled upper limb catheters– should not be in place for more than 7 days.
- 3.3. Catheters must be removed when there are signs of catheter related infections except in extenuating cases
- 3.4. Re-wiring of catheters is **NOT** recommended in the setting of any catheter related infection

**Supplementary Table S1.** Baseline characteristics of tunnelled catheters during baseline, intervention or both phases.

|                                      | Baseline only |         | Study Phase |         | Intervention only |         |
|--------------------------------------|---------------|---------|-------------|---------|-------------------|---------|
|                                      | N             | %       | N           | %       | N                 | %       |
| Number of catheters                  | 2889          |         | 1038        |         | 3476              |         |
| Venous insertion site, n (%)         |               |         |             |         |                   |         |
| R internal jugular                   | 2,226         | (77.1%) | 834         | (80.3%) | 2,731             | (78.6%) |
| L internal jugular                   | 469           | (16.2%) | 149         | (14.4%) | 558               | (16.1%) |
| R femoral                            | 43            | (1.5%)  | 11          | (1.1%)  | 71                | (2.0%)  |
| L femoral                            | 26            | (0.9%)  | 5           | (0.5%)  | 31                | (0.9%)  |
| R subclavian                         | 63            | (2.2%)  | 26          | (2.5%)  | 44                | (1.3%)  |
| L subclavian                         | 37            | (1.3%)  | 6           | (0.6%)  | 15                | (0.4%)  |
| Other                                | 25            | (0.9%)  | 7           | (0.7%)  | 26                | (0.7%)  |
| Reason for catheter insertion, n (%) |               |         |             |         |                   |         |
| Acute kidney injury                  | 910           | (31.5%) | 173         | (16.7%) | 993               | (28.6%) |
| Commence maintenance HD              | 1,001         | (34.6%) | 478         | (46.1%) | 1,415             | (40.7%) |
| AV access complication               | 546           | (18.9%) | 201         | (19.4%) | 623               | (17.9%) |
| Transfer from PD                     | 373           | (12.9%) | 165         | (15.9%) | 377               | (10.8%) |
| Failing transplant                   | 21            | (0.7%)  | 14          | (1.3%)  | 22                | (0.6%)  |
| Other                                | 38            | (1.3%)  | 7           | (0.7%)  | 46                | (1.3%)  |
| Catheter proceduralist, n (%)        |               |         |             |         |                   |         |
| Interventional radiology             | 1,957         | (67.7%) | 634         | (61.1%) | 2,434             | (70.0%) |
| Nephrology                           | 341           | (11.8%) | 172         | (16.6%) | 393               | (11.3%) |
| Surgery                              | 484           | (16.8%) | 182         | (17.5%) | 469               | (13.5%) |
| Critical care                        | 52            | (1.8%)  | 21          | (2.0%)  | 89                | (2.6%)  |
| Not known                            | 55            | (1.9%)  | 29          | (2.8%)  | 91                | (2.6%)  |

Abbreviations: AV = arteriovenous, HD = hemodialysis, PD = peritoneal dialysis, L = Left, R = Right

**Supplementary Table S2.** Relationship between patient-level and catheter-level covariates and the incidence of catheter dysfunction among tunnelled catheters from three-level Poisson regression models.

|                                 | Model 1 |              | Model 2 |              | Model 3 |              |
|---------------------------------|---------|--------------|---------|--------------|---------|--------------|
|                                 | IRR     | (95% CI)     | IRR     | (95% CI)     | IRR     | (95% CI)     |
| <b>Intervention</b>             |         |              |         |              |         |              |
| Baseline                        | 1.00    | (ref)        | 1.00    | (ref)        | 1.00    | (ref)        |
| Intervention                    | 0.65    | (0.47, 0.90) | 0.68    | (0.49, 0.94) | 0.68    | (0.49, 0.94) |
| <b>Time period</b>              |         |              |         |              |         |              |
| 1                               | 1.00    | (ref)        | 1.00    | (ref)        | 1.00    | (ref)        |
| 2                               | 0.94    | (0.73, 1.21) | 0.93    | (0.72, 1.20) | 0.93    | (0.72, 1.20) |
| 3                               | 1.06    | (0.77, 1.46) | 1.04    | (0.76, 1.42) | 1.03    | (0.75, 1.42) |
| 4                               | 1.25    | (0.85, 1.83) | 1.16    | (0.79, 1.70) | 1.14    | (0.78, 1.67) |
| <b>Insertion site</b>           |         |              |         |              |         |              |
| R internal jugular              |         |              | 1.00    | (ref)        | 1.00    | (ref)        |
| L internal jugular              |         |              | 2.15    | (1.76, 2.64) | 2.09    | (1.70, 2.57) |
| R femoral                       |         |              | 3.30    | (1.93, 5.66) | 3.30    | (1.93, 5.66) |
| L femoral                       |         |              | 4.77    | (2.39, 9.49) | 4.73    | (2.37, 9.44) |
| R subclavian                    |         |              | 1.54    | (0.85, 2.78) | 1.44    | (0.80, 2.61) |
| L subclavian                    |         |              | 3.02    | (1.31, 6.99) | 2.90    | (1.26, 6.66) |
| Other                           |         |              | 1.71    | (0.78, 3.74) | 1.57    | (0.72, 3.43) |
| <b>Age category, years</b>      |         |              |         |              |         |              |
| <50                             |         |              |         |              | 1.04    | (0.78, 1.38) |
| 50-60                           |         |              |         |              | 1.34    | (1.01, 1.77) |
| 60-70                           |         |              |         |              | 1.00    | (ref)        |
| 70-80                           |         |              |         |              | 1.27    | (0.98, 1.64) |
| >80                             |         |              |         |              | 1.06    | (0.73, 1.53) |
| <b>Gender</b>                   |         |              |         |              |         |              |
| Male                            |         |              |         |              | 1.00    | (ref)        |
| Female                          |         |              |         |              | 1.38    | (1.14, 1.67) |
| <b>Diabetes mellitus</b>        |         |              |         |              |         |              |
| Absent                          |         |              |         |              | 1.00    | (ref)        |
| Diet controlled                 |         |              |         |              | 1.06    | (0.74, 1.50) |
| Medication required             |         |              |         |              | 1.02    | (0.84, 1.25) |
| <b>Catheter indication</b>      |         |              |         |              |         |              |
| Kidney failure                  |         |              |         |              | 1.00    | (ref)        |
| Acute kidney injury             |         |              |         |              | 0.86    | (0.68, 1.08) |
| <b>Proceduralist department</b> |         |              |         |              |         |              |
| Interventional radiology        |         |              |         |              | 1.00    | (ref)        |
| Nephrology                      |         |              |         |              | 0.72    | (0.42, 1.26) |
| Surgery                         |         |              |         |              | 1.01    | (0.66, 1.54) |
| Critical care                   |         |              |         |              | 1.26    | (0.45, 3.50) |
| Other                           |         |              |         |              | 0.97    | (0.53, 1.76) |

Abbreviations: IRR = Incidence Rate Ratio, R = Right, L = Left, ICU = Intensive care unit, ref = reference category



**Supplementary Figure S1.** Illustration of multiple levels of clustering when catheter-level characteristics are included in assessing the intervention effect in a stepped wedge cluster randomized trial.

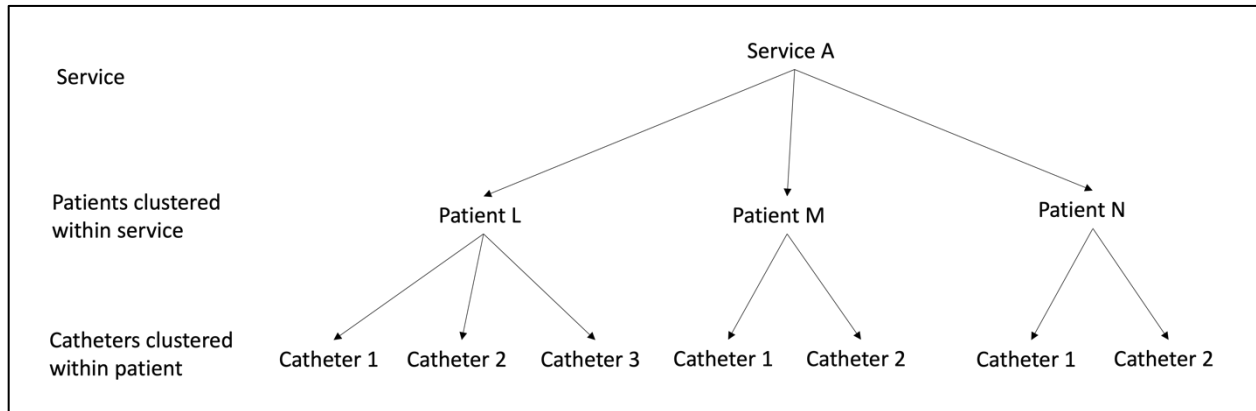

**Supplementary Figure S2.** Participant flow diagram for the post-hoc analysis of the REDUCTION national stepped-wedge cluster randomized trial.

\*Catheter days were excluded due to unknown reason for catheter removal (n= 310 catheters, 198 participants) or unknown tunnel status (n = 2 catheters, 2 participants).

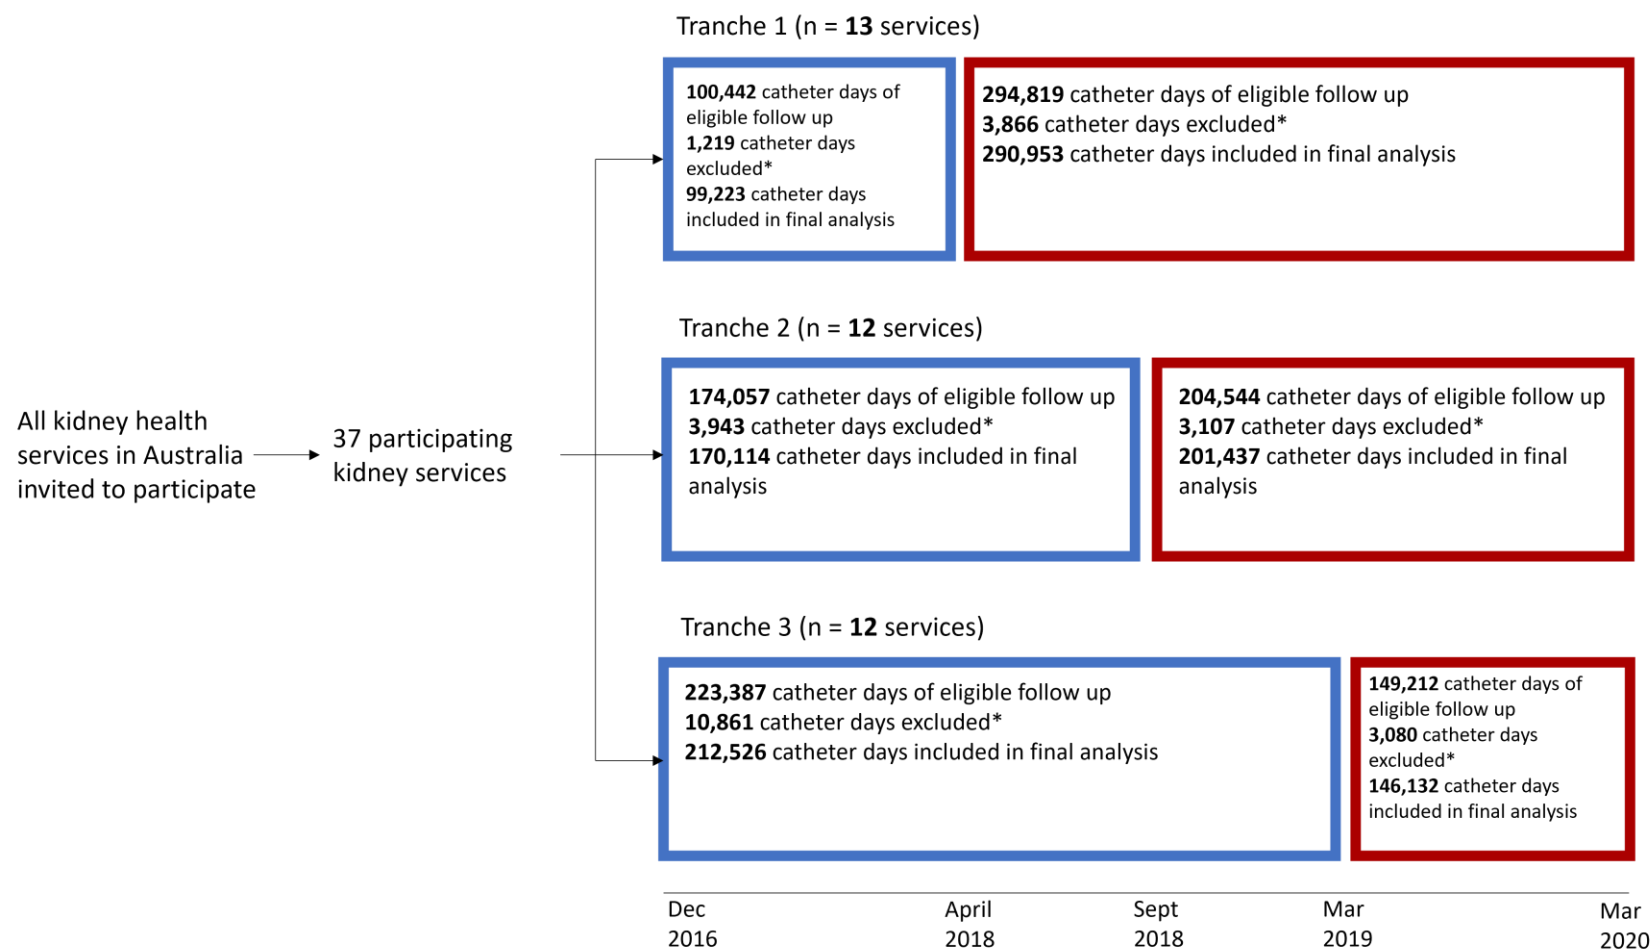

| <b>Supplementary materials 3: Checklist of information to include when reporting a stepped wedge cluster randomised trial (SW-CRT)</b> |                |                                                                                                                                                                                                                                                                                                                      |                |
|----------------------------------------------------------------------------------------------------------------------------------------|----------------|----------------------------------------------------------------------------------------------------------------------------------------------------------------------------------------------------------------------------------------------------------------------------------------------------------------------|----------------|
| <b>Topic</b>                                                                                                                           | <b>Item no</b> | <b>Checklist item</b>                                                                                                                                                                                                                                                                                                | <b>Page no</b> |
| <b>Title and abstract</b>                                                                                                              |                |                                                                                                                                                                                                                                                                                                                      |                |
|                                                                                                                                        | 1a             | Identification as a SW-CRT in the title.                                                                                                                                                                                                                                                                             |                |
|                                                                                                                                        | 1b             | Structured summary of trial design, methods, results, and conclusions (see separate SW-CRT checklist for abstracts).                                                                                                                                                                                                 |                |
| <b>Introduction</b>                                                                                                                    |                |                                                                                                                                                                                                                                                                                                                      |                |
| Background and objectives                                                                                                              | 2a             | Scientific background. Rationale for using a cluster design and rationale for using a stepped wedge design.                                                                                                                                                                                                          |                |
|                                                                                                                                        | 2b             | Specific objectives or hypotheses.                                                                                                                                                                                                                                                                                   |                |
| <b>Methods</b>                                                                                                                         |                |                                                                                                                                                                                                                                                                                                                      |                |
| Trial design                                                                                                                           | 3a             | Description and diagram of trial design including definition of cluster, number of sequences, number of clusters randomised to each sequence, number of periods, duration of time between each step, and whether the participants assessed in different periods are the same people, different people, or a mixture. |                |
|                                                                                                                                        | 3b             | Important changes to methods after trial commencement (such as eligibility criteria), with reasons.                                                                                                                                                                                                                  |                |
| Participants                                                                                                                           | 4a             | Eligibility criteria for clusters and participants.                                                                                                                                                                                                                                                                  |                |
|                                                                                                                                        | 4b             | Settings and locations where the data were collected.                                                                                                                                                                                                                                                                |                |
| Interventions                                                                                                                          | 5              | The intervention and control conditions with sufficient details to allow replication, including whether the intervention was maintained or repeated, and whether it was delivered at the cluster level, the individual participant level, or both.                                                                   |                |
| Outcomes                                                                                                                               | 6a             | Completely defined prespecified primary and secondary outcome measures, including how and when they were assessed.                                                                                                                                                                                                   |                |
|                                                                                                                                        | 6b             | Any changes to trial outcomes after the trial commenced, with reasons.                                                                                                                                                                                                                                               |                |
| Sample size                                                                                                                            | 7a             | How sample size was determined. Method of calculation and relevant parameters with sufficient detail so the calculation can be replicated. Assumptions made about correlations between outcomes of participants from the same cluster. (see separate checklist for SW-CRT sample size items).                        |                |
|                                                                                                                                        | 7b             | When applicable, explanation of any interim analyses and stopping guidelines.                                                                                                                                                                                                                                        |                |
| <b>Randomisation</b>                                                                                                                   |                |                                                                                                                                                                                                                                                                                                                      |                |
| Sequence generation                                                                                                                    | 8a             | Method used to generate the random allocation to the sequences of treatments.                                                                                                                                                                                                                                        |                |
|                                                                                                                                        | 8b             | Type of randomisation; details of any constrained randomisation or stratification, if used.                                                                                                                                                                                                                          |                |
| Allocation concealment mechanism                                                                                                       | 9              | Specification that allocation was based on clusters; description of any methods used to conceal the allocation from the clusters until after recruitment.                                                                                                                                                            |                |
| Implementation                                                                                                                         | 10a            | Who generated the randomisation schedule, who enrolled clusters, and who assigned clusters to sequences.                                                                                                                                                                                                             |                |
|                                                                                                                                        | 10b            | Mechanism by which individual participants were included in clusters for the purposes of the trial (such as complete enumeration, random sampling; continuous recruitment or ascertainment; or recruitment at a fixed point in time), including who recruited or identified participants.                            |                |
|                                                                                                                                        | 10c            | Whether, from whom and when consent was sought and for what; whether this differed between treatment conditions.                                                                                                                                                                                                     |                |
| Blinding                                                                                                                               | 11a            | If done, who was blinded after assignment to sequences (eg, cluster level participants, individual level participants, those assessing outcomes) and how.                                                                                                                                                            |                |
|                                                                                                                                        | 11b            | If relevant, description of the similarity of treatments.                                                                                                                                                                                                                                                            |                |
| Statistical methods                                                                                                                    | 12a            | Statistical methods used to compare treatment conditions for primary and secondary outcomes including how time effects, clustering and repeated measures were taken into account.                                                                                                                                    |                |
|                                                                                                                                        | 12b            | Methods for additional analyses, such as subgroup analyses, sensitivity analyses, and adjusted analyses.                                                                                                                                                                                                             |                |

(Continued)

**Supplementary materials 3 (Continued)**

| Topic                                                | Item no | Checklist item                                                                                                                                                                                                                                                    | Page no |
|------------------------------------------------------|---------|-------------------------------------------------------------------------------------------------------------------------------------------------------------------------------------------------------------------------------------------------------------------|---------|
| <b>Results</b>                                       |         |                                                                                                                                                                                                                                                                   |         |
| Participant flow (a diagram is strongly recommended) | 13a     | For each treatment condition or allocated sequence, the numbers of clusters and participants who were assessed for eligibility, were randomly assigned, received intended treatments, and were analysed for the primary outcome (see separate SW-CRT flow chart). |         |
|                                                      | 13b     | For each treatment condition or allocated sequence, losses and exclusions for both clusters and participants with reasons.                                                                                                                                        |         |
| Recruitment                                          | 14a     | Dates defining the steps, initiation of intervention, and deviations from planned dates. Dates defining recruitment and follow-up for participants.                                                                                                               |         |
|                                                      | 14b     | Why the trial ended or was stopped.                                                                                                                                                                                                                               |         |
| Baseline data                                        | 15      | Baseline characteristics for the individual and cluster levels as applicable for each treatment condition or allocated sequence.                                                                                                                                  |         |
| Numbers analysed                                     | 16      | The number of observations and clusters included in each analysis for each treatment condition and whether the analysis was according to the allocated schedule.                                                                                                  |         |
| Outcomes and estimation                              | 17a     | For each primary and secondary outcome, results for each treatment condition, and the estimated effect size and its precision (such as 95% confidence interval); any correlations (or covariances) and time effects estimated in the analysis.                    |         |
|                                                      | 17b     | For binary outcomes, presentation of both absolute and relative effect sizes is recommended.                                                                                                                                                                      |         |
| Ancillary analyses                                   | 18      | Results of any other analyses performed, including subgroup analyses and adjusted analyses, distinguishing prespecified from exploratory.                                                                                                                         |         |
| Harms                                                | 19      | Important harms or unintended effects in each treatment condition (for specific guidance see CONSORT for harms).                                                                                                                                                  |         |
| <b>Discussion</b>                                    |         |                                                                                                                                                                                                                                                                   |         |
| Limitations                                          | 20      | Trial limitations, addressing sources of potential bias, imprecision, and, if relevant, multiplicity of analyses.                                                                                                                                                 |         |
| Generalisability                                     | 21      | Generalisability (external validity, applicability) of the trial findings. Generalisability to clusters or individual participants, or both (as relevant).                                                                                                        |         |
| Interpretation                                       | 22      | Interpretation consistent with results, balancing benefits and harms, and considering other relevant evidence.                                                                                                                                                    |         |
| <b>Other information</b>                             |         |                                                                                                                                                                                                                                                                   |         |
| Registration                                         | 23      | Registration number and name of trial registry.                                                                                                                                                                                                                   |         |
| Protocol                                             | 24      | Where the full trial protocol can be accessed, if available.                                                                                                                                                                                                      |         |
| Funding                                              | 25      | Sources of funding and other support (such as supply of drugs), and the role of funders.                                                                                                                                                                          |         |
| Research ethics review                               | 26      | Whether the study was approved by a research ethics committee, with identification of the review committee(s). Justification for any waiver or modification of informed consent requirements.                                                                     |         |

This checklist has been taken from table 3 in *BMJ* 2018;363:k1614, as a standalone document for readers to print out or fill in electronically.
